# Supplementary material
Source: PubMed Central journal article supplement (PMC4313209)
Supplement: JCM.02060-14_zjm999093815so1.pdf [file JCM.02060-14_zjm999093815so1.pdf]

Table S1. iSCA versus gSCA in 25 patients on ART

| Patient ID | Plasma HIV-1 RNA<br>(Copies per milliliter of plasma) |      |
|------------|-------------------------------------------------------|------|
|            | gSCA                                                  | iSCA |
| 1          | <0.6                                                  | 7.6  |
| 2          | 1.3                                                   | <0.6 |
| 3          | <0.6                                                  | 1.8  |
| 4          | <0.6                                                  | 1.3  |
| 5          | 15                                                    | 0.6  |
| 6          | <0.6                                                  | <0.6 |
| 7          | 6.3                                                   | <0.6 |
| 8          | <0.6                                                  | 3.7  |
| 9          | 0.7                                                   | <0.7 |
| 10         | <0.6                                                  | <0.6 |
| 11         | 11                                                    | 5.1  |
| 12         | <0.6                                                  | 4.4  |
| 13         | <0.6                                                  | 2.6  |
| 14         | 1.9                                                   | <0.7 |
| 15         | 1.3                                                   | 2.4  |
| 16         | <0.6                                                  | <0.6 |
| 17         | 1.3                                                   | 3.3  |
| 18         | <0.7                                                  | <0.7 |
| 19         | <0.7                                                  | 1.9  |

|    |      |     |
|----|------|-----|
| 20 | 2.6  | 4.9 |
| 21 | 160  | 147 |
| 22 | 8.5  | 6.8 |
| 23 | <0.7 | 2   |
| 24 | 3.3  | 8.5 |
| 25 | 26   | 78  |
